# Supplementary material for: Carnosine Counteracts the Molecular Alterations Aβ Oligomers-Induced in Human Retinal Pigment Epithelial Cells
Source: MDPI journal article supplement (doi:10.3390/molecules28083324), 2023-04-09
Supplement: s1 [file s1]

Dr. Nicolò Musso  
University of Catania, BIOMETEC  
Via Santa Sofia 97  
95124 Catania  
Italy

**Analytical Report:**  
**Cell Line Authentication Test**  
**Order ID: 11108356895**

Person in charge: Dr. Torsten Brendel  
Report date: 29.03.2023  
Sample received on: 22.03.2023  
Start / End of Analysis: 22.03.2023/29.03.2023

**Method:**

Genetic characteristics were determined by PCR-single-locus-technology.  
16 independent PCR-systems D8S1179, D21S11, D7S820, CSF1PO, D3S1358, TH01, D13S317, D16S539, D2S1338, AMEL, D5S818, FGA, D19S433, vWA, TPOX and D18S51 were investigated.  
(ASN-0002 core markers are colored grey, Thermo Fisher, AmpFISTR® Identifier® Plus PCR Amplification Kit)  
In parallel, positive and negative controls were carried out yielding correct results.  
Method details are given in **SOP\_APG\_Zelllinienauthentizität\_2.0**

**Result:**

|                           |            |
|---------------------------|------------|
| <b>Client Sample Name</b> | ARPE-19    |
| <b>Sample Code</b>        | CL00012416 |
| D8S1179                   | 13,13      |
| D21S11                    | 28,29      |
| D7S820                    | 9,11       |
| CSF1PO                    | 11,11      |
| D3S1358                   | 14,15      |
| TH01                      | 6,9,3      |
| D13S317                   | 11,12      |
| D16S539                   | 9,11       |
| D2S1338                   | 19,19      |
| D19S433                   | 12,13      |
| vWA                       | 16,19      |
| TPOX                      | 9,11       |
| D18S51                    | 12,16      |
| AMEL                      | X,Y        |
| D5S818                    | 13,13      |
| FGA                       | 23,23      |
| <b>Database Name</b>      | ARPE-19    |

The table shows the result of the cell line analysis and the comparison with the online database of the DSMZ (<http://www.dsmz.de/de/service/services-human-and-animal-cell>) and the Cellosaurus database (<https://web.expasy.org/cellosaurus>). Please note that only the PCR-systems according to ANSI/ATCC standard ASN-0002 were aligned (D5S818, D13S317, D7S820, D16S539, VWA, TH01, TPOX, CSF1PO, AMEL - colored grey).

The laboratory is accredited acc. to DIN EN ISO/IEC 17025:2018. All analyses have been carried out with greatest care and on the basis of state of the art scientific knowledge. The results refer solely to the analysed samples, as received. The duplication and publication also in parts requires a written authorization by this laboratory. Our General Terms and Conditions apply exclusively and are available under [eurofinsgenomics.com](http://eurofinsgenomics.com)

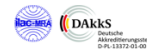

Eurofins Genomics Europe  
Applied Genomics GmbH

Anzinger Straße 7 a  
85560 Ebersberg  
Germany

Tel.: +49 7531 816068  
Email: [support.eu@genomics.eurofinseu.com](mailto:support.eu@genomics.eurofinseu.com)  
Web: [www.eurofinsgenomics.com](http://www.eurofinsgenomics.com)

Managing Director: Dr. Michael Hadem  
Authorized Officer: Matthias Dittmer  
Register Court **Munich** HRB 207710  
VAT ID: DE815473648

HypoVereinsbank  
IBAN: DE23 2073 0017 7000 0006 50  
SWIFT: HYVEDEMM17

**This report was created automatically and is  
therefore valid without a signature.**
