# Supplementary material for: Carnosine Counteracts the Molecular Alterations Aβ Oligomers-Induced in Human Retinal Pigment Epithelial Cells
Source: Molecules. 2023 Apr 9;28(8):3324. doi: 10.3390/molecules28083324 (PMC10146178; doi:10.3390/molecules28083324)
Supplement: Supplementary file 1 [file molecules-28-03324-s001.zip]

Archive with 7 entries (7 files):
- CRL-2302.xlsx
- Data.pptx
- Figure S1.tif
- Figure S2.tif
- Orig_Cert.pdf
- Supp file 1.pdf
- Supp file 2.pdf
