# Supplementary material for: Carnosine Counteracts the Molecular Alterations Aβ Oligomers-Induced in Human Retinal Pigment Epithelial Cells
Source: Molecules. 2023 Apr 9;28(8):3324. doi: 10.3390/molecules28083324 (PMC10146178; doi:10.3390/molecules28083324)
Supplement: Supplementary file 1 [file molecules-28-03324-s001.zip › CRL-2302.xlsx]

## Sheet: Foglio1
ATCC CERTIFICATE OF ANALYSIS CRL-2302™			Eurifins Genoomics Cell Line Authentication Test
STR	Locus 1	Locus 2	STR	Locus 1	Locus 2	Match:
TH01:	6	9.3	TH01	6	9.3	1
D5S818:	13		D5S818	13	13	1
D13S317:	11	12	D13S317:	11	12	1
D7S820:	9	11	D7S820:	9	11	1
D16S539:	9	11	D16S539:	9	11	1
CSF1PO:	11		CSF1PO:	11	11	1
Amelogenin:	X	Y	Amelogenin:	X	Y	1
vWA:	16	19	vWA:	16	19	1
TPOX:	9	11	TPOX:	9	11	1
