# Supplementary figures and images for: Carnosine Counteracts the Molecular Alterations Aβ Oligomers-Induced in Human Retinal Pigment Epithelial Cells
Source: MDPI journal article supplement (doi:10.3390/molecules28083324), 2023-04-09

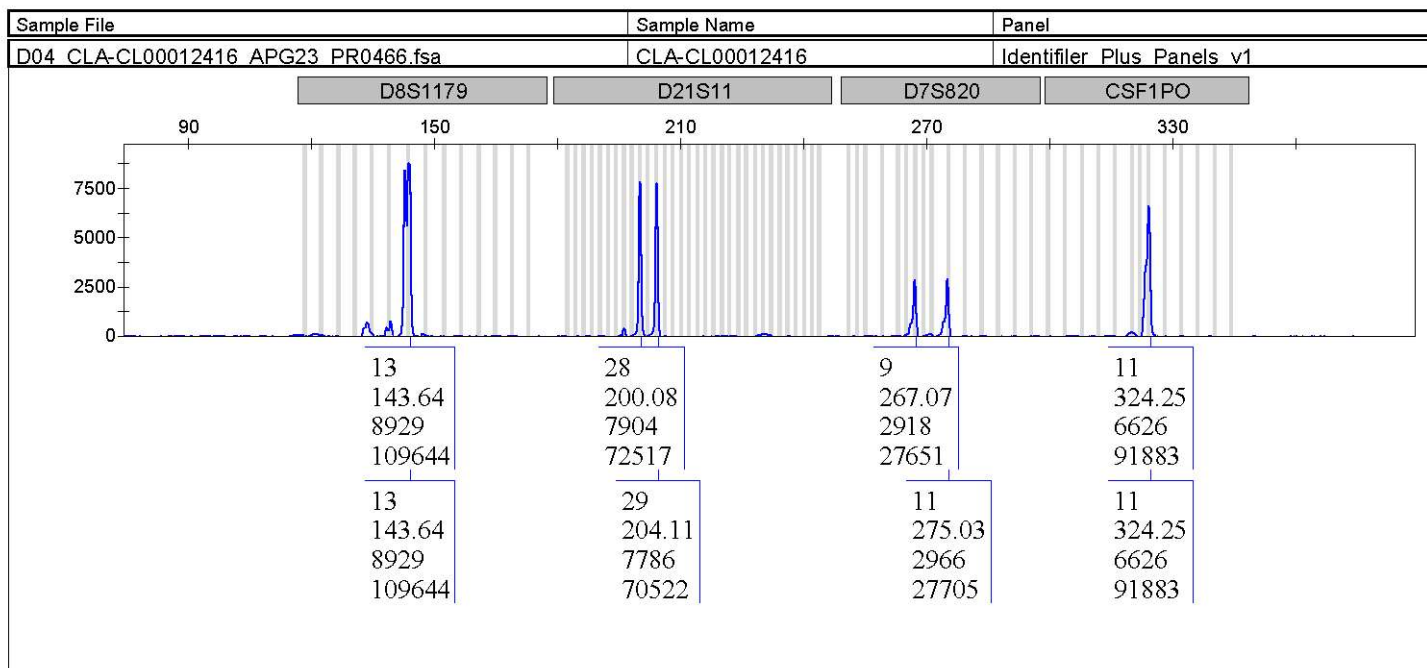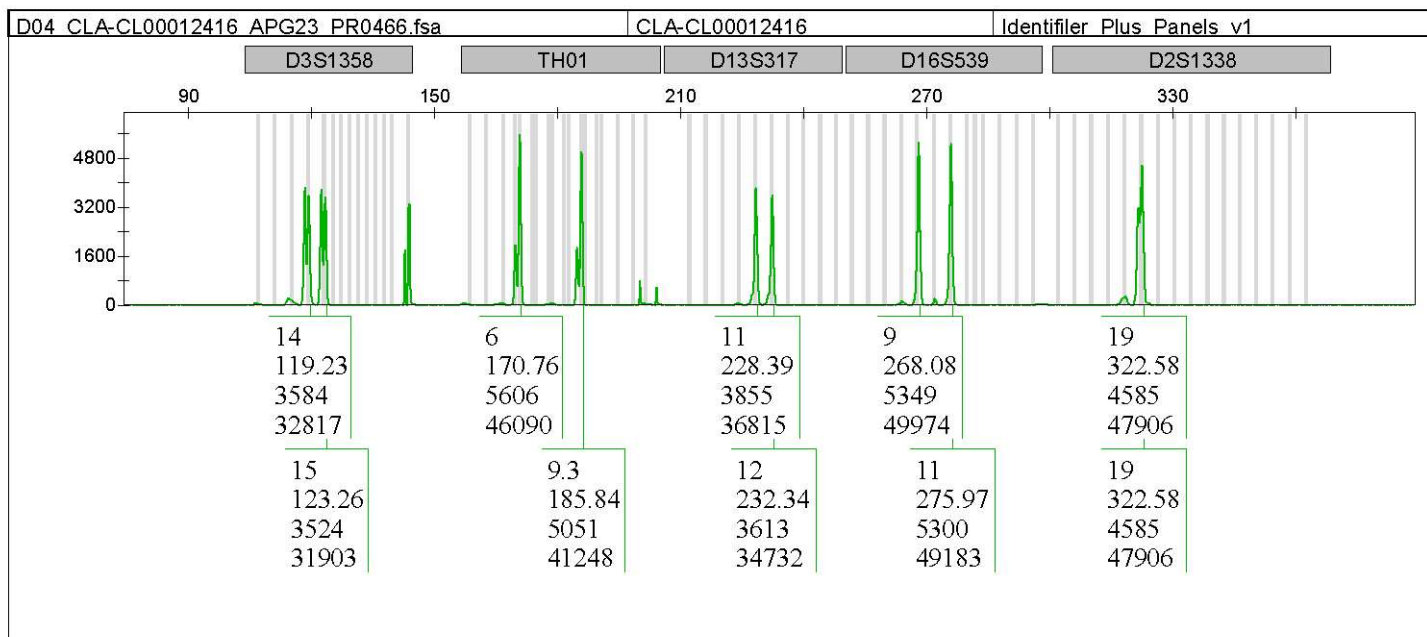

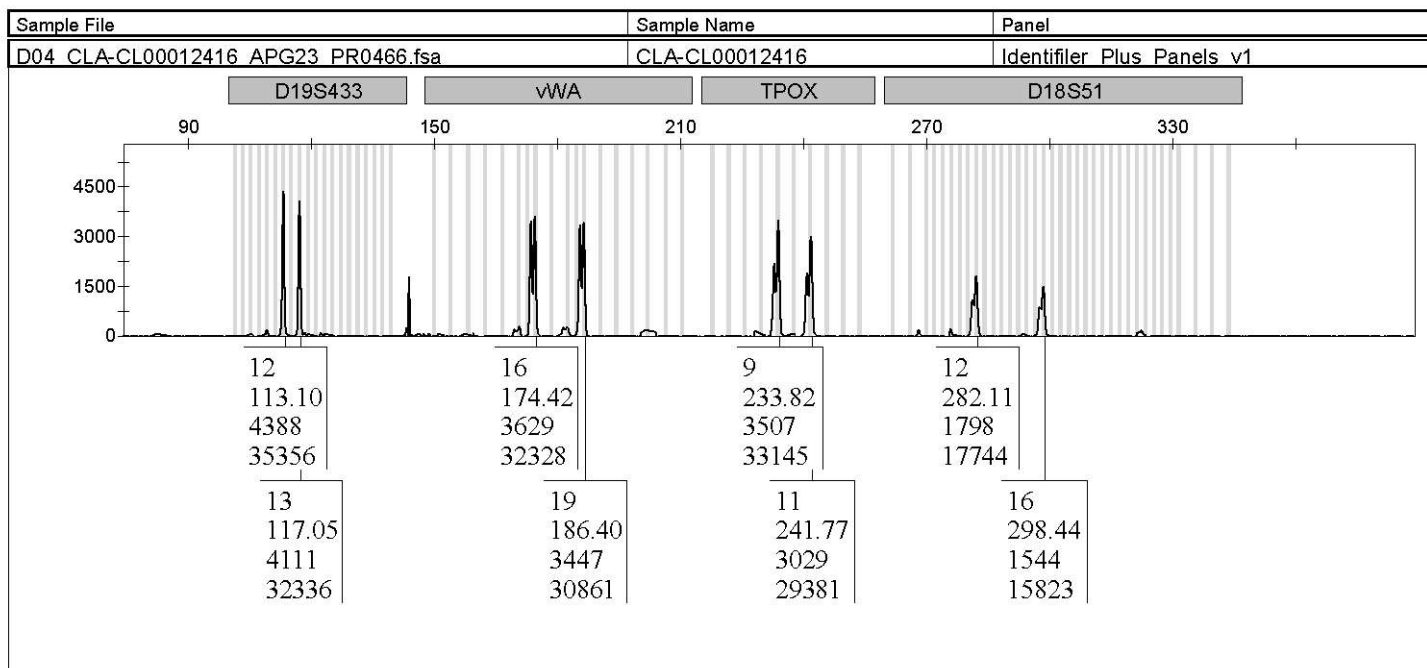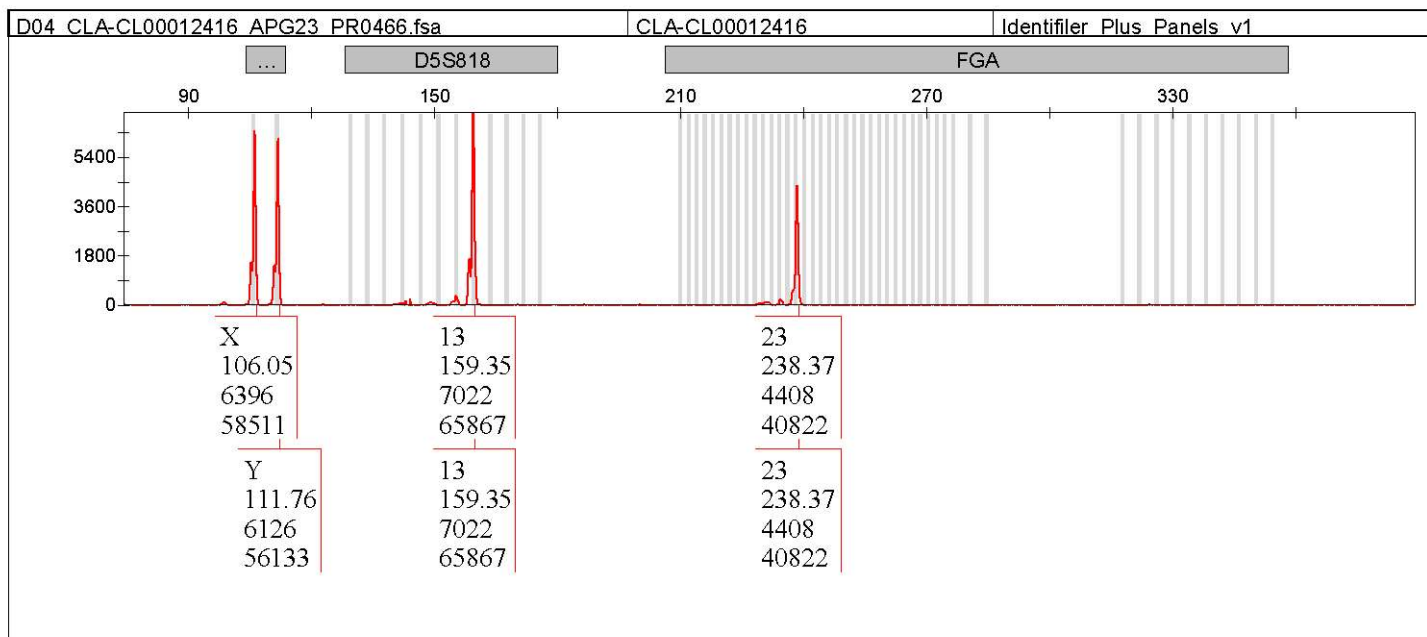

Supplement: s1 [file s1]
